# Supplementary material
Source: HighWire-hosted journal article supplement (https://www.cfp.ca/highwire/filestream/30393/field_highwire_adjunct_files/0/CC_Fig1.pdf)
Supplement: CC_Fig1.pdf [file CC_Fig1.pdf]

**Figure 1. Global annual mean surface air temperature change:** *Uncertainty bars (95% confidence limits) are shown for both the annual and 5-year means and account only for incomplete spatial sampling of data.*

---

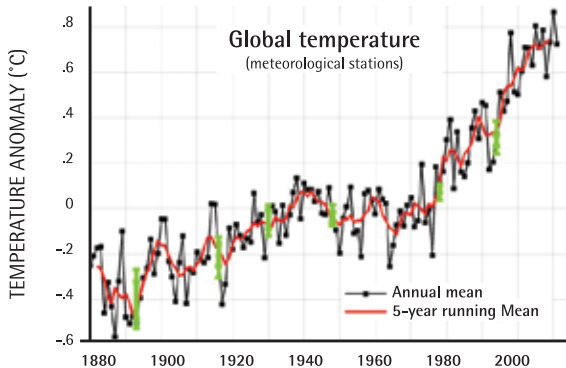

Reprinted from National Aeronautics and Space Administration Goddard Institute for Space Studies.<sup>6</sup>
